# Supplementary material
Source: PubMed Central journal article supplement (PMC3775507)
Supplement: NIHMS471082-supplement-1.pdf [file NIHMS471082-supplement-1.pdf]

**Table S1. Developmental Onset of Phenotypic Abnormalities in *Senp1* Mutant Embryos, Related to Figure 1**

| Strain                           | Stage         | Normal | Abnormal/dead | Resorbed |
|----------------------------------|---------------|--------|---------------|----------|
| <i>Senp1<sup>MI</sup></i> inbred | e9.5          | 5      | 0             | 0        |
|                                  | e10.5         | 15     | 0             | 0        |
|                                  | e11.5         | 13     | 5             | 12       |
|                                  | e12.5         | 12     | 13            | 22       |
|                                  | e13.5         | 10     | 11            | 33       |
|                                  | e14.5 – e15.5 | 4      | 20            | 40       |
| <i>Senp1<sup>Gt</sup></i> inbred | e10.5         | 7      | 2             | 0        |
|                                  | e11.5         | 0      | 4             | 5        |
|                                  | e12.5         | 1      | 3             | 6        |
| <i>Senp1<sup>Gt</sup></i> mixed  | e8.5 – e9.5   | 13     | 4             | 4        |
|                                  | e10.5         | 10     | 3             | 9        |
|                                  | e11.5         | 4      | 2             | 0        |
|                                  | e12.5         | 5      | 3             | 4        |
|                                  | e13.5 – e14.5 | 3      | 9             | 13       |

The number of *Senp1<sup>Gt</sup>* or *Senp1<sup>MI</sup>* homozygous embryos that were either phenotypically normal, or showed developmental abnormalities or were dead, listed by embryonic stage. Also listed is the number of partial or complete resorptions found at each developmental stage. Although impossible to genotype accurately, the majority of resorbed embryos likely represent mutants that died prior to dissection.
